# Supplementary material for: Environmental exposures and the risk of multiple sclerosis in Saudi Arabia
Source: Springer Nature journal article supplement (doi:10.1186/s12883-018-1090-8), 2018-06-18
Supplement: MOESM1 [file 15857298]

**Additional file 1. Table S.** Bivariate analysis of variables associated with risk of Multiple Sclerosis.

|                                         |                    | MS<br>N=307 (%) | Control<br>N=307 (%) | OR   | 95% CI      | P value |
|-----------------------------------------|--------------------|-----------------|----------------------|------|-------------|---------|
| First child in family                   | Yes                | 76 (25)         | 43 (14)              | 2.02 | 1.34 – 3.06 | 0.001   |
|                                         | No                 | 231 (75)        | 264 (86)             |      |             |         |
| Family History of MS                    | Yes                | 57 (19)         | 13 (4)               | 5.16 | 2.76 – 9.64 | <0.001  |
|                                         | No                 | 250 (81)        | 294 (96)             |      |             |         |
| Sun exposure during primary school      | High               | 139 (45)        | 185 (60)             | 0.55 | 0.40 - 0.75 | <0.001  |
|                                         | Low                | 168 (55)        | 122 (40)             |      |             |         |
| Sun exposure during intermediate school | High               | 94 (31)         | 138 (45)             | 0.54 | 0.39 - 0.75 | <0.001  |
|                                         | Low                | 213 (69)        | 169 (55)             |      |             |         |
| Sun exposure during secondary school    | High               | 65 (21)         | 115 (38)             | 0.45 | 0.31 - 0.64 | <0.001  |
|                                         | Low                | 242 (79)        | 192 (63)             |      |             |         |
| Sun exposure during university*         | High               | 54 (18)         | 120 (40)             | 0.33 | 0.23 - 0.49 | <0.001  |
|                                         | Low                | 248 (82)        | 184 (60)             |      |             |         |
| Servings of Fruits / week               | ≥ 5                | 77 (25)         | 162 (53)             | 0.30 | 0.21 - 0.42 | < 0.001 |
|                                         | < 5                | 230 (75)        | 145 (47)             |      |             |         |
| Servings of vegetables / week           | ≥ 5                | 145 (47)        | 187 (61)             | 0.57 | 0.42 - 0.79 | 0.001   |
|                                         | < 5                | 162 (53)        | 120 (39)             |      |             |         |
| Dates Times / week                      | ≥ 5                | 156 (51)        | 161 (52)             | 0.94 | 0.68 - 1.29 | 0.686   |
|                                         | < 5                | 151 (49)        | 146 (48)             |      |             |         |
| Red meat Times / week                   | ≥ 5                | 38 (12)         | 39 (13)              | 0.97 | 0.60 - 1.57 | 0.903   |
|                                         | < 5                | 269 (88)        | 268 (87)             |      |             |         |
| Fast food Times / week                  | ≥ 5                | 46 (15)         | 16 (5)               | 3.21 | 1.77 – 5.80 | < 0.001 |
|                                         | < 5                | 261 (85)        | 291 (95)             |      |             |         |
| Milk Times / week                       | ≥ 5                | 84 (27)         | 68 (22)              | 1.32 | 0.92 – 1.91 | 0.135   |
|                                         | < 5                | 223 (73)        | 239 (78)             |      |             |         |
| Dairy products Times / week             | ≥ 5                | 162 (53)        | 135 (44)             | 1.42 | 1.04 – 1.96 | 0.036   |
|                                         | < 5                | 145 (47)        | 172 (56)             |      |             |         |
| Milk type**                             | Breast milk        | 203 (76)        | 218 (82)             | 0.75 | 0.47 – 1.2  | 0.230   |
|                                         | Artificial formula | 46 (17)         | 37 (41)              |      |             |         |
| Coffee intake                           | yes                | 112 (36)        | 160 (52)             | 0.53 | 0.38 – 0.73 | <0.001  |
|                                         | no                 | 195 (64)        | 147 (48)             |      |             |         |
| Measles                                 | Yes                | 63 (21)         | 24 (8)               | 3.05 | 1.85 - 5.02 | <0.001  |
|                                         | No                 | 244 (79)        | 283 (92)             |      |             |         |
| Chicken pox                             | Yes                | 167 (54)        | 175 (57)             | 0.90 | 0.65 - 1.24 | 0.57    |
|                                         | No                 | 140 (46)        | 132 (43)             |      |             |         |
| Appendectomy                            | Yes                | 29 (9)          | 39 (13)              | 0.72 | 0.43 – 1.19 | 0.25    |
|                                         | No                 | 278 (91)        | 268 (87)             |      |             |         |
| Tonsillectomy                           | Yes                | 52 (17)         | 43 (14)              | 1.25 | 0.81 – 1.94 | 0.37    |
|                                         | No                 | 255 (83)        | 264 (86)             |      |             |         |

| <b>Medical history of</b>             |                 |            |            |      |              |       |
|---------------------------------------|-----------------|------------|------------|------|--------------|-------|
| Type I diabetes mellitus              | Yes             | 15 (5)     | 22 (7)     | 0.67 | 0.34 – 1.31  | 0.235 |
|                                       | No              | 292 (95)   | 285 (93)   |      |              |       |
| Migraine                              | Yes             | 35 (11)    | 38 (12)    | 0.91 | 0.56 – 1.49  | 0.708 |
|                                       | No              | 272 (89)   | 269 (88)   |      |              |       |
| Systematic lupus erythematosus        | Yes             | 1 (0.3)    | 5 (2)      | 0.19 | 0.02 – 1.69  | 0.22  |
|                                       | No              | 306 (99.6) | 302 (98)   |      |              |       |
| Rheumatoid arthritis                  | Yes             | 17 (6)     | 18 (6)     | 0.94 | 0.48 – 1.86  | 0.86  |
|                                       | No              | 290 (94)   | 289 (94)   |      |              |       |
| Thyroid disorder                      | Yes             | 19 (6)     | 33 (11)    | 0.55 | 0.30 – 0.99  | 0.042 |
|                                       | No              | 288 (94)   | 274 (89)   |      |              |       |
| Crohn's disease                       | Yes             | 1 (0.3)    | 1 (0.3)    | 1    | 0.06 – 16.06 | 1.00  |
|                                       | No              | 306 (99.6) | 306 (99.6) |      |              |       |
| Ulcerative colitis                    | Yes             | 18 (6)     | 13 (4)     | 1.41 | 0.68 – 2.93  | 0.357 |
|                                       | No              | 289 (94)   | 294 (96)   |      |              |       |
| Psoriasis                             | Yes             | 7 (2)      | 4 (1)      | 1.77 | 0.51 – 6.10  | 0.361 |
|                                       | No              | 300 (98)   | 303 (99)   |      |              |       |
| <b>Family history of</b>              |                 |            |            |      |              |       |
| Type I diabetes mellitus              | Yes             | 154 (50)   | 153 (50)   | 1.01 | 0.74 – 1.39  | 0.936 |
|                                       | No              | 153 (50)   | 154 (50)   |      |              |       |
| Migraine                              | Yes             | 53 (17)    | 58 (19)    | 0.90 | 0.59 – 1.35  | 0.600 |
|                                       | No              | 254 (83)   | 249 (81)   |      |              |       |
| Systematic lupus erythematosus        | Yes             | 10 (3)     | 16 (5)     | 0.61 | 0.27 – 1.37  | 0.229 |
|                                       | No              | 297 (97)   | 291 (95)   |      |              |       |
| Rheumatoid arthritis                  | Yes             | 69 (22)    | 68 (22)    | 1.02 | 0.70 – 1.49  | 0.923 |
|                                       | No              | 238 (78)   | 239 (78)   |      |              |       |
| Tobacco use                           | Current smokers | 58 (19)    | 52 (17)    | 1.16 | 0.77 – 1.76  | 0.47  |
|                                       | Ex-smokers      | 19 (6)     | 15 (5)     | 1.32 | 0.84 – 1.56  | 0.43  |
|                                       | Never smokers   | 230 (75)   | 240 (78)   | Ref. |              |       |
| Passive smoking in childhood          | Yes             | 113 (37)   | 113 (37)   | 1    | 0.72 – 1.39  | 1     |
|                                       | No              | 194 (63)   | 194 (63)   |      |              |       |
| BMI                                   | ≥ 30            | 76 (25)    | 74 (24)    | 0.92 | 0.62 – 1.37  | 0.67  |
|                                       | 25 – 29.99      | 90 (29)    | 107 (35)   | 0.75 | 0.52 – 1.09  | 0.13  |
|                                       | ≤ 24.99         | 141 (46)   | 126 (41)   | Ref. |              |       |
| Parental consanguinity (first cousin) | Yes             | 63 (21)    | 85 (28)    | 0.67 | 0.46 – 0.98  | 0.03  |
|                                       | No              | 244 (79)   | 222 (72)   |      |              |       |
| Age of menstruation                   | 9-12 Year       | 98 (43)    | 92 (40)    | 1.11 | 0.77 – 1.61  | 0.57  |
|                                       | ≥ 13 Year       | 132 (57)   | 138 (60)   |      |              |       |

\* Not applicable (5 MS cases and 3 controls).

\*\* Not know (58 MS cases and 52 controls)
